# Supplementary material
Source: Springer Nature journal article supplement (https://www.springermedizin.de/resource/supplementary/13054_2012_2998_MOESM1_ESM.pdf/9712348)
Supplement: MOESM1 [file 9712348]

**Additional file Table S1: Patient characteristics of non-transfused and transfused patients**

|                                     | <b>Non-transfused</b><br>(n=1146) | <b>Transfused</b><br>(n=652) | <b>P-value</b> |
|-------------------------------------|-----------------------------------|------------------------------|----------------|
| <b>Age, years</b>                   | 61 [48-72]                        | 66 [56-75]                   | <0.001         |
| <b>Male gender</b>                  | 741 (64.7%)                       | 411 (63.0%)                  | 0.506          |
| <b>Operative admission</b>          | 309 (27.0%)                       | 331 (50.8%)                  | <0.001         |
| <b>Emergency admission</b>          | 1060/1142 (92.8%)                 | 514/642 (80.1%)              | <0.001         |
| <b>Emergency surgery &lt;1 week</b> | 228 (19.9%)                       | 187 (28.7%)                  | 0.201          |
| <b>Cardiac or vascular surgery</b>  | 102 (8.9%)                        | 170 (26.1)                   | <0.001         |
| <b>Trauma</b>                       | 72 (6.3%)                         | 44 (6.7%)                    | 0.691          |
| <b>Severe sepsis</b>                | 319 (27.8%)                       | 222 (34.0%)                  | 0.006          |
| <b>DIC</b>                          | 27/1116 (2.4%)                    | 46/629 (7.3%)                | <0.001         |
| <b>Acute kidney injury</b>          | 366 (31.9%)                       | 309 (47.4%)                  | <0.001         |
| <b>Renal replacement therapy</b>    | 68 (5.9%)                         | 96 (14.7%)                   | <0.001         |
| <b>SAPS II score</b>                | 35 [26-48]                        | 37 [29-50]                   | <0.001         |
| <b>Maximum SOFA score*</b>          | 7 [4-9]                           | 8 [6-11]                     | <0.001         |
| <b>Lactate** (mmol/L)</b>           | 2.1 [1.3-3.7]                     | 2.40 [1.44-4.41]             | <0.001         |
| <b>Massive transfusion pre-ICU†</b> | 22 (1.9%)                         | 39 (6.0%)                    | <0.001         |
| <b>Admission hemoglobin (g/L)‡</b>  | 120 [107-133]                     | 98 [88-110]                  | <0.001         |

Data are expressed as median [IQR] or count (percentage)

DIC Disseminated Intravascular Coagulopathy, IQR Interquartile Range

\*Data missing for 1 transfused patient

\*\* Highest lactate 24 h preceding ICU admission or on first ICU treatment day. Data missing for 264 non-transfused and 51 transfused patients.

†Transfusion >10 RBC units in 24 hours

‡Data missing for 130 non-transfused and 77 transfused patients.

ICU intensive care unit, DIC disseminated intravascular coagulopathy, SAPS II Simplified

Acute Physiology Score, SOFA Sequential Organ Failure Assessment

**Additional file Table S2:** Times for ICU (Intensive Care Unit) admission and AKI (Acute Kidney Injury).

|                                                                          | <b>Q1</b>           | <b>Q2</b>          | <b>Q3</b>          | <b>Q4</b>          | <b>P</b> |
|--------------------------------------------------------------------------|---------------------|--------------------|--------------------|--------------------|----------|
| <b>no of patients with AKI</b>                                           | 52                  | 78                 | 90                 | 89                 |          |
| <b>Time from ICU admission to first AKI (hours)</b>                      | 17.2<br>[8.0-32.0]  | 11.0<br>[5.8-25.7] | 10.9<br>[5.0-29.4] | 8.5<br>[1.4-20.3]  | 0.052    |
| <b>Time from ICU admission to highest AKI (hours)</b>                    | 19.4<br>[12.2-35.6] | 20.5<br>[6.7-39.2] | 22.6<br>[8.8-41.1] | 14.8<br>[5.3-42.9] | 0.531    |
| <b>Time from ICU admission to first RBC (days) median (IQR)</b>          | 0 [0-1]             | 0 [0-1]            | 0[0-2]             | 0[0-2]             | 0.625    |
| <b>Time from ICU admission to first RBC (days) mean (SD)</b>             | 0.94 (1.9)          | 1.1 (2.1)          | 1.4(2.5)           | 1.5 (3.5)          |          |
| <b>Time from hospital admission to ICU admission (days) median (IQR)</b> | 1 [0-2]             | 1 [0-2]            | 1 [0-2]            | 1 [0-2.3]          | 0.957    |
| <b>Time from hospital admission to ICU admission (days) mean (SD)</b>    | 5.0 (31.2)          | 5.5 (30.5)         | 4.4 (27.6)         | 3.5 (10.2)         |          |

**Additional file Table S3:** Odds ratios with 95% Confidence Intervals of logistic regression analysis for hospital mortality

| Variable                                        | Odds ratio | 95% Confidence Interval |        | P-value |
|-------------------------------------------------|------------|-------------------------|--------|---------|
|                                                 |            | Lower                   | Upper  |         |
| Age                                             | 1.036      | 1.015                   | 1.057  | 0.001   |
| Propensity score for receiving >14 days old RBC | 0.693      | 0.023                   | 20.591 | 0.832   |
| Number of transfused units                      | 1.013      | 0.978                   | 1.050  | 0.466   |
| Acute kidney injury                             | 0.93       | 0.513                   | 1.686  | 0.811   |
| Severe sepsis                                   | 0.881      | 0.491                   | 1.580  | 0.671   |
| RBC age Q 2-4 vs. Q1                            | 2.157      | 1.023                   | 4.546  | 0.043   |
| APACHE II diagnosis group                       | 1.001      | 0.999                   | 1.003  | 0.354   |
| Operative admission                             | 1.539      | 0.817                   | 2.898  | 0.182   |
| Emergency admission                             | 2.394      | 0.671                   | 8.540  | 0.178   |
| DIC                                             | 1.632      | 0.68                    | 3.915  | 0.272   |
| SAPS II score without age points                | 1.031      | 1.009                   | 1.054  | 0.005   |
| SOFA score, maximum during ICU stay             | 1.213      | 1.093                   | 1.345  | <0.001  |
| Highest lactate                                 | 1.054      | 0.993                   | 1.120  | 0.085   |
| Female gender                                   | 0.864      | 0.504                   | 1.482  | 0.596   |

Included patients 571 (132 in Q1 and 468 in Q2-4)

Hosmer-Lemeshow Chi-square 7.781, P=0.455

**Additional file Table S4:** Cox regression analysis for 90 –day mortality (enter method)

| Variable                                        | Hazard ratio, HR | 95% confidence interval for HR |       | P-value |
|-------------------------------------------------|------------------|--------------------------------|-------|---------|
|                                                 |                  | Lower                          | Upper |         |
| Age                                             | 1.030            | 1.017                          | 1.043 | <0.001  |
| Propensity score for receiving >14 days old RBC | 0.268            | 0.033                          | 2.196 | 0.22    |
| Number of transfused units                      | 1.021            | 1.004                          | 1.040 | 0.019   |
| Acute kidney injury                             | 0.828            | 0.563                          | 1.219 | 0.339   |
| Severe sepsis                                   | 0.863            | 0.608                          | 1.226 | 0.411   |
| RBC age Q2-4 vs.Q1                              | 1.182            | 0.757                          | 1.847 | 0.462   |
| APACHE II diagnosis group                       | 1.000            | 0.999                          | 1.001 | 0.707   |
| Operative admission                             | 1.266            | 0.861                          | 1.862 | 0.231   |
| Emergency admission                             | 1.480            | 0.657                          | 3.334 | 0.345   |
| DIC                                             | 1.073            | 0.649                          | 1.775 | 0.783   |
| SAPS II score without age points                | 1.024            | 1.010                          | 1.037 | 0.001   |
| SOFA score, maximum during ICU stay             | 1.163            | 1.092                          | 1.239 | <0.001  |
| Highest lactate                                 | 1.008            | 0.971                          | 1.046 | 0.68    |
| Female gender                                   | 1.161            | 0.828                          | 1.627 | 0.386   |
